# Supplementary material for: Cadmium triggers an integrated reprogramming of the metabolism of Synechocystis PCC6803, under the control of the Slr1738 regulator
Source: Springer Nature journal article supplement (doi:10.1186/1471-2164-8-350), 2007-10-02
Supplement: 12864_2007_1063_MOESM10_ESM.pdf [file 12864_2007_1063_MOESM10_ESM.pdf]

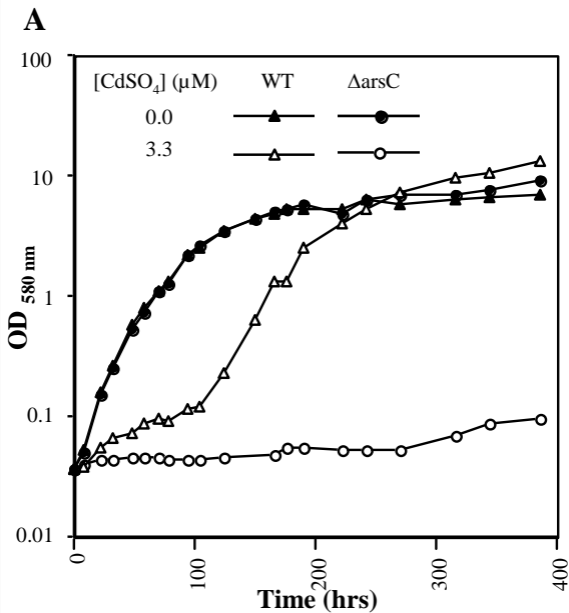

**B**

WT

ΔarsC

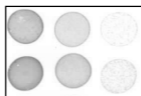

BG11

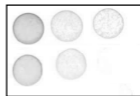

+ 2 μM CdSO<sub>4</sub>
