# Supplementary material for: Cadmium triggers an integrated reprogramming of the metabolism of Synechocystis PCC6803, under the control of the Slr1738 regulator
Source: Springer Nature journal article supplement (doi:10.1186/1471-2164-8-350), 2007-10-02

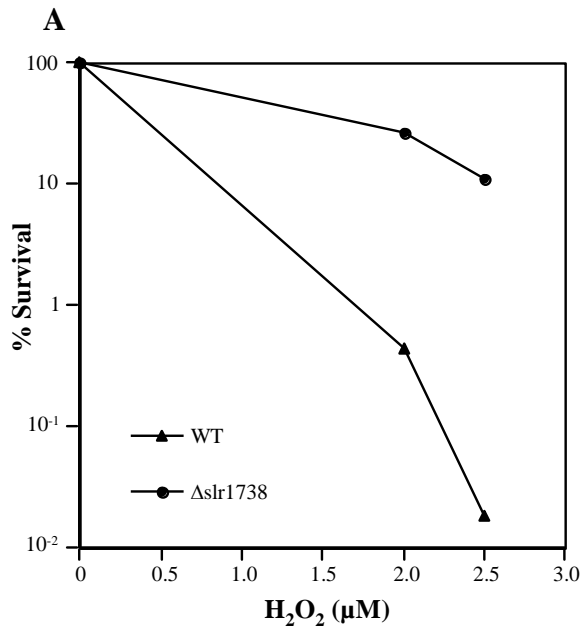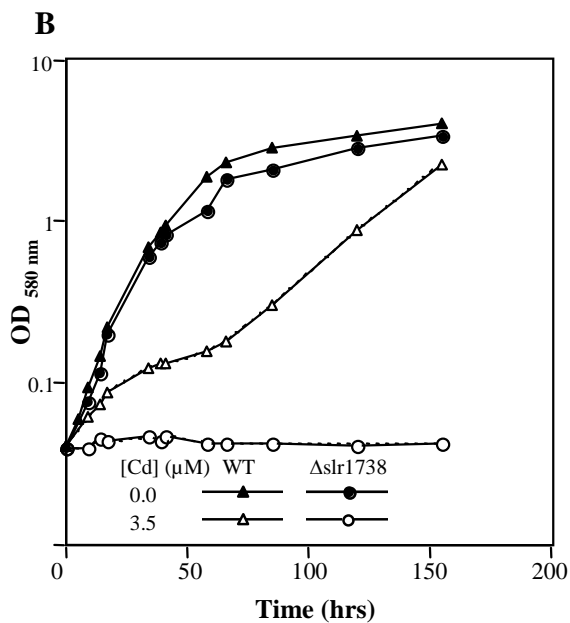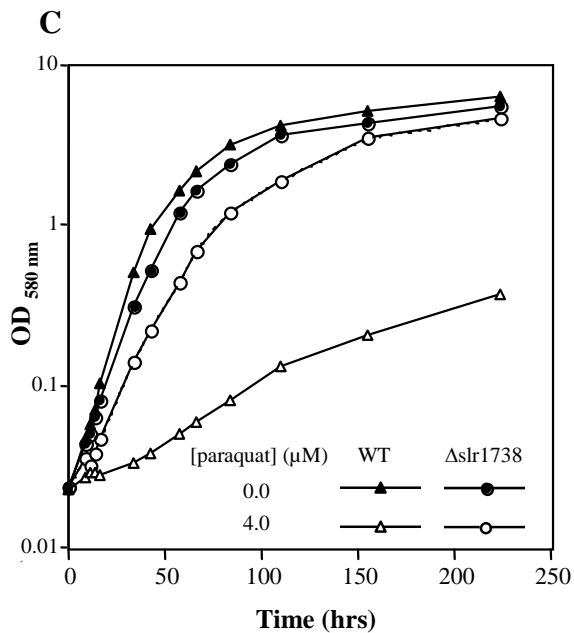

**D**

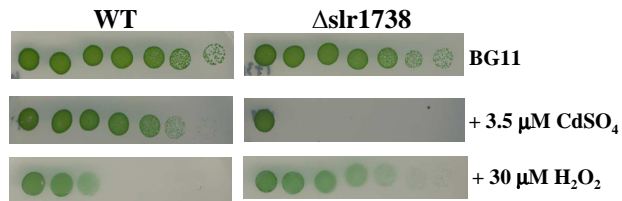

Supplement: 12864_2007_1063_MOESM11_ESM.pdf [file 12864_2007_1063_MOESM11_ESM.pdf]
